# Supplementary material
Source: publisher figshare collection journal article supplement (https://karger.figshare.com/ndownloader/files/37424710)
Supplement: Supplementary file 1 [file 37424710]

Supplemental Table 3: Univariate analyses of baseline characteristics and ultrasonographic findings according to the number of small INVs

| Number of small INVs | SINVs Q1 | SINVs Q2 | SINVs Q3 | SINVs Q4 | *P* |
| --- | --- | --- | --- | --- | --- |
|  | Q1≤165 | 166≤Q2≤254 | 255≤Q3≤374 | 375≤Q4 |  |
|  | N=29 | N=29 | N=29 | N=28 |  |
| Age* | 74.2±6.6 | 74.6±7.1 | 72.2±6.6 | 70.8±8.2 | 0.14 |
| Sex, male, n (%) | 24 (82.8%) | 25 (86.2%) | 24 (82.8%) | 23 (82.1%) | 0.98 |
| Symptomatic, n (%) | 9 (31.0%) | 14 (48.3%) | 15 (51.7%) | 15 (53.6%) | 0.3 |
| Hypertension, n (%) | 24 (82.8%) | 21 (72.4%) | 26 (89.7%) | 15 (53.6%) | 0.011 |
| Diabetes mellitus, n (%) | 11 (37.9%) | 12 (41.4%) | 10 (34.5%) | 19 (67.9%) | 0.047 |
| Dyslipidemia, n (%) | 17 (58.6%) | 22 (75.9%) | 19 (65.5%) | 17 (60.7%) | 0.52 |
| Smoking, n (%) | 13 (44.8%) | 21 (72.4%) | 21 (72.4%) | 22 (78.6%) | 0.031 |
| Drinking, n (%) | 21 (72.4%) | 19 (65.5%) | 21 (72.4%) | 19 (67.9%) | 0.92 |
| Ischemic heart disease, n (%) | 5 (17.2%) | 9 (31.0%) | 9 (31.0%) | 5 (17.9%) | 0.42 |
| Peripheral arterial disease, n (%) | 2 (6.9%) | 3 (10.3%) | 1 (3.4%) | 2 (7.1%) | 0.79 |
| Statins, n (%) | 19 (65.5%) | 21 (72.4%) | 20 (69.0%) | 13 (46.4%) | 0.18 |
| Angiotensin receptor blockers, n (%) | 14 (48.3%) | 10 (34.5%) | 15 (51.7%) | 9 (32.1%) | 0.34 |
| Antiplatelet drugs, n (%) | 23 (79.3%) | 28 (96.6%) | 24 (82.8%) | 23 (82.1%) | 0.25 |
| Degree of stenosis* | 70.0±16.7 | 73.4±15.7 | 69.6±17.2 | 84.0±12.6 | 0.002 |

*: Analysis of variance
